# Supplementary material for: Dye adsorbed on copolymer, possible specific sorbent for metal ions removal
Source: Royal Society of Chemistry journal article supplement (doi:10.1039/c4ra02918f), 2014-01-01

Supp. Fig. 1a. FT-IR spectra of p(StDVB-NMe)

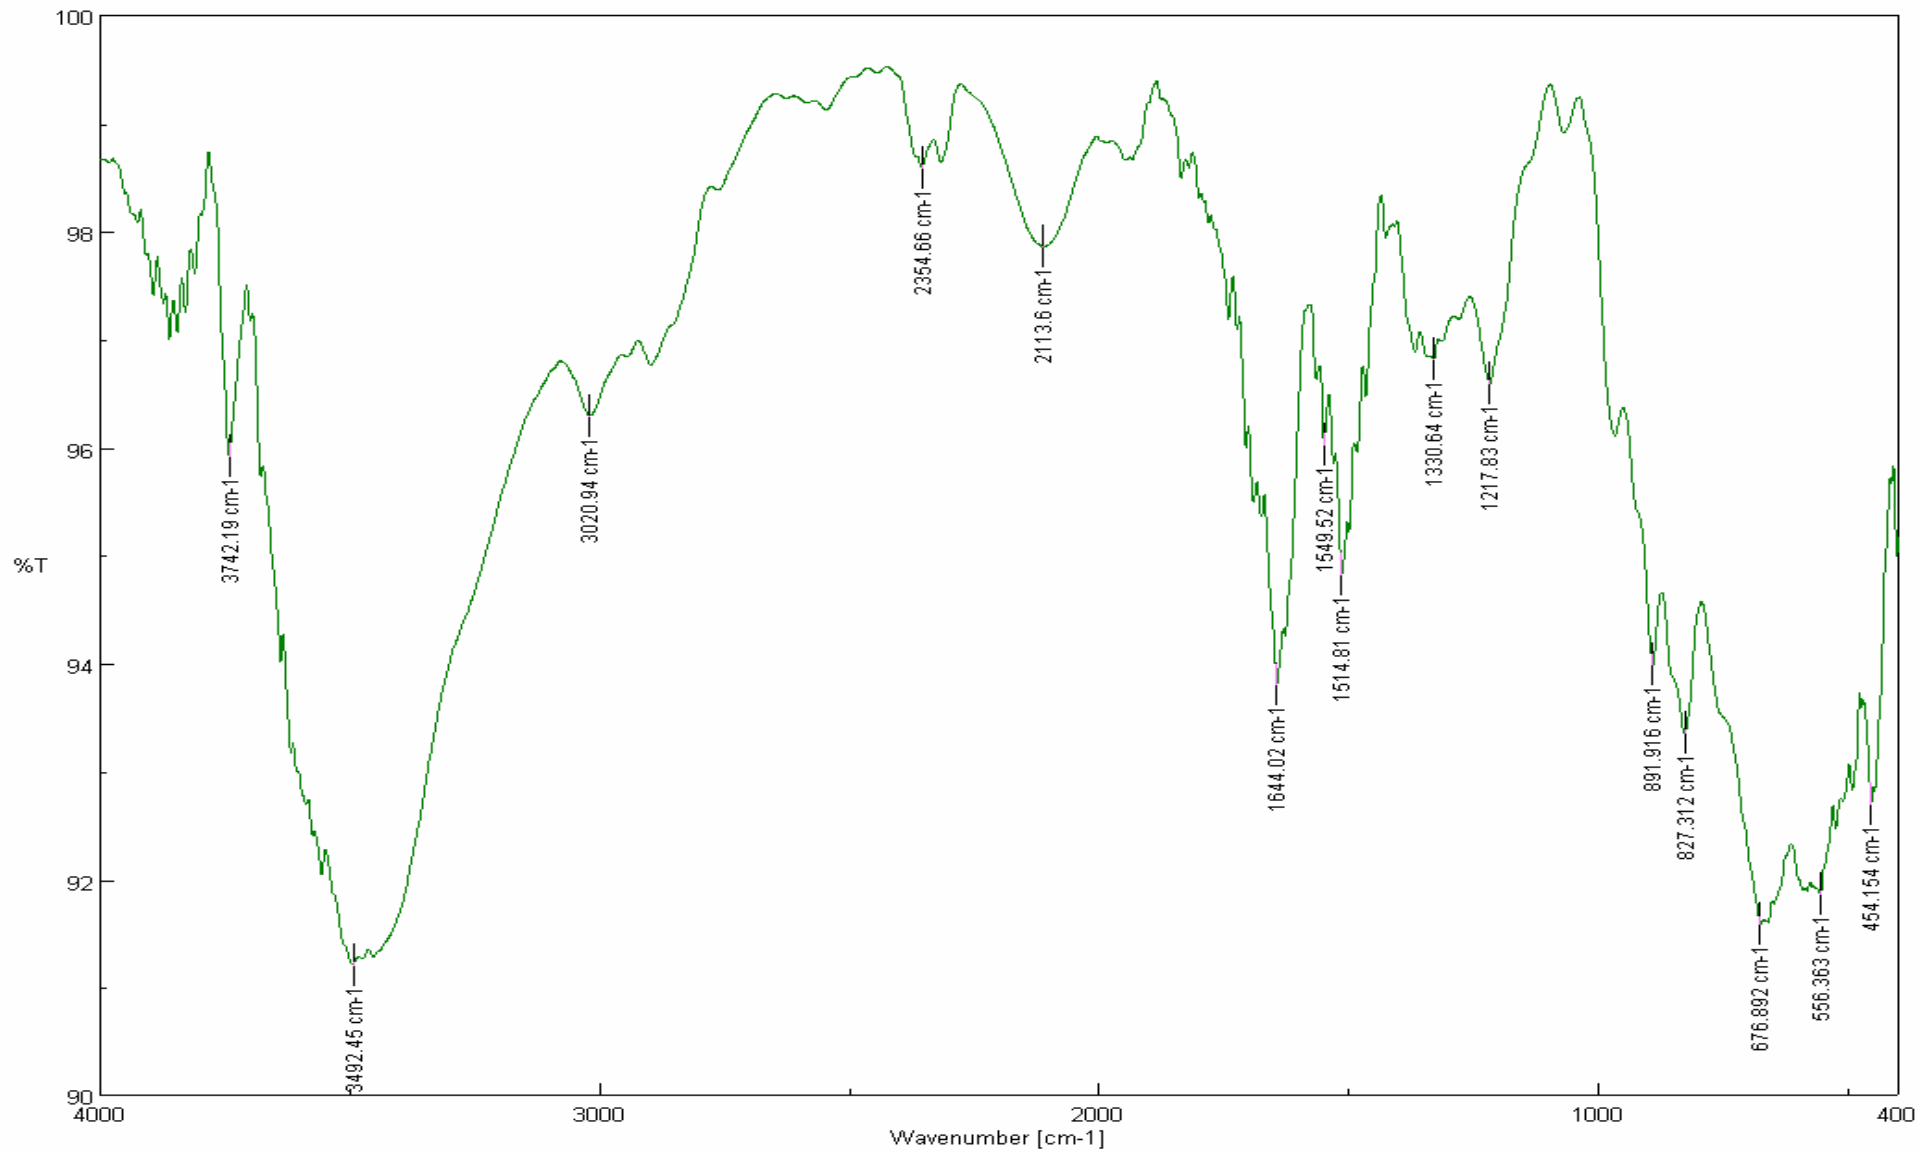

Supp. Fig. 1b. FT-IR spectra of AHDS dye

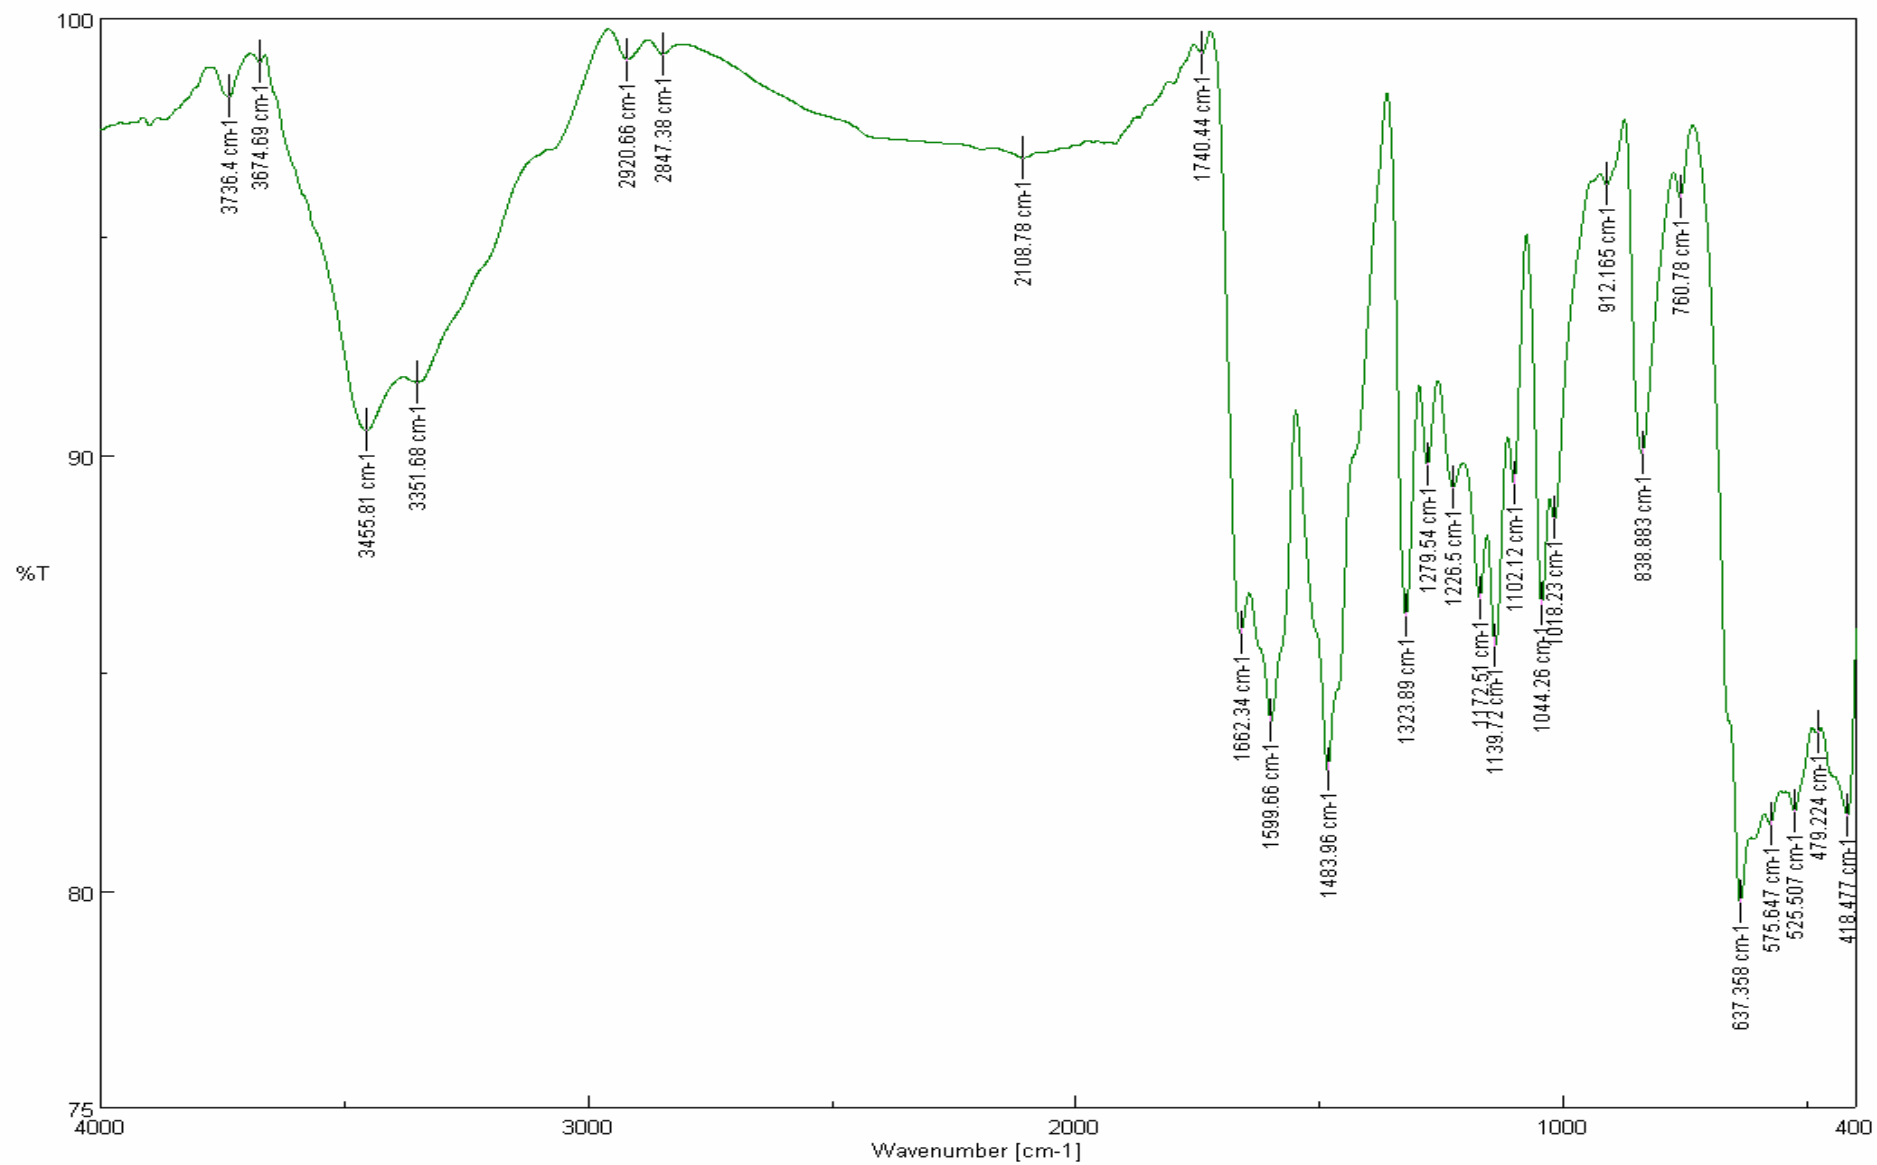

Supp. Fig. 1c. FT-IR spectra of *AHDS-p(StDVB-NMe)*

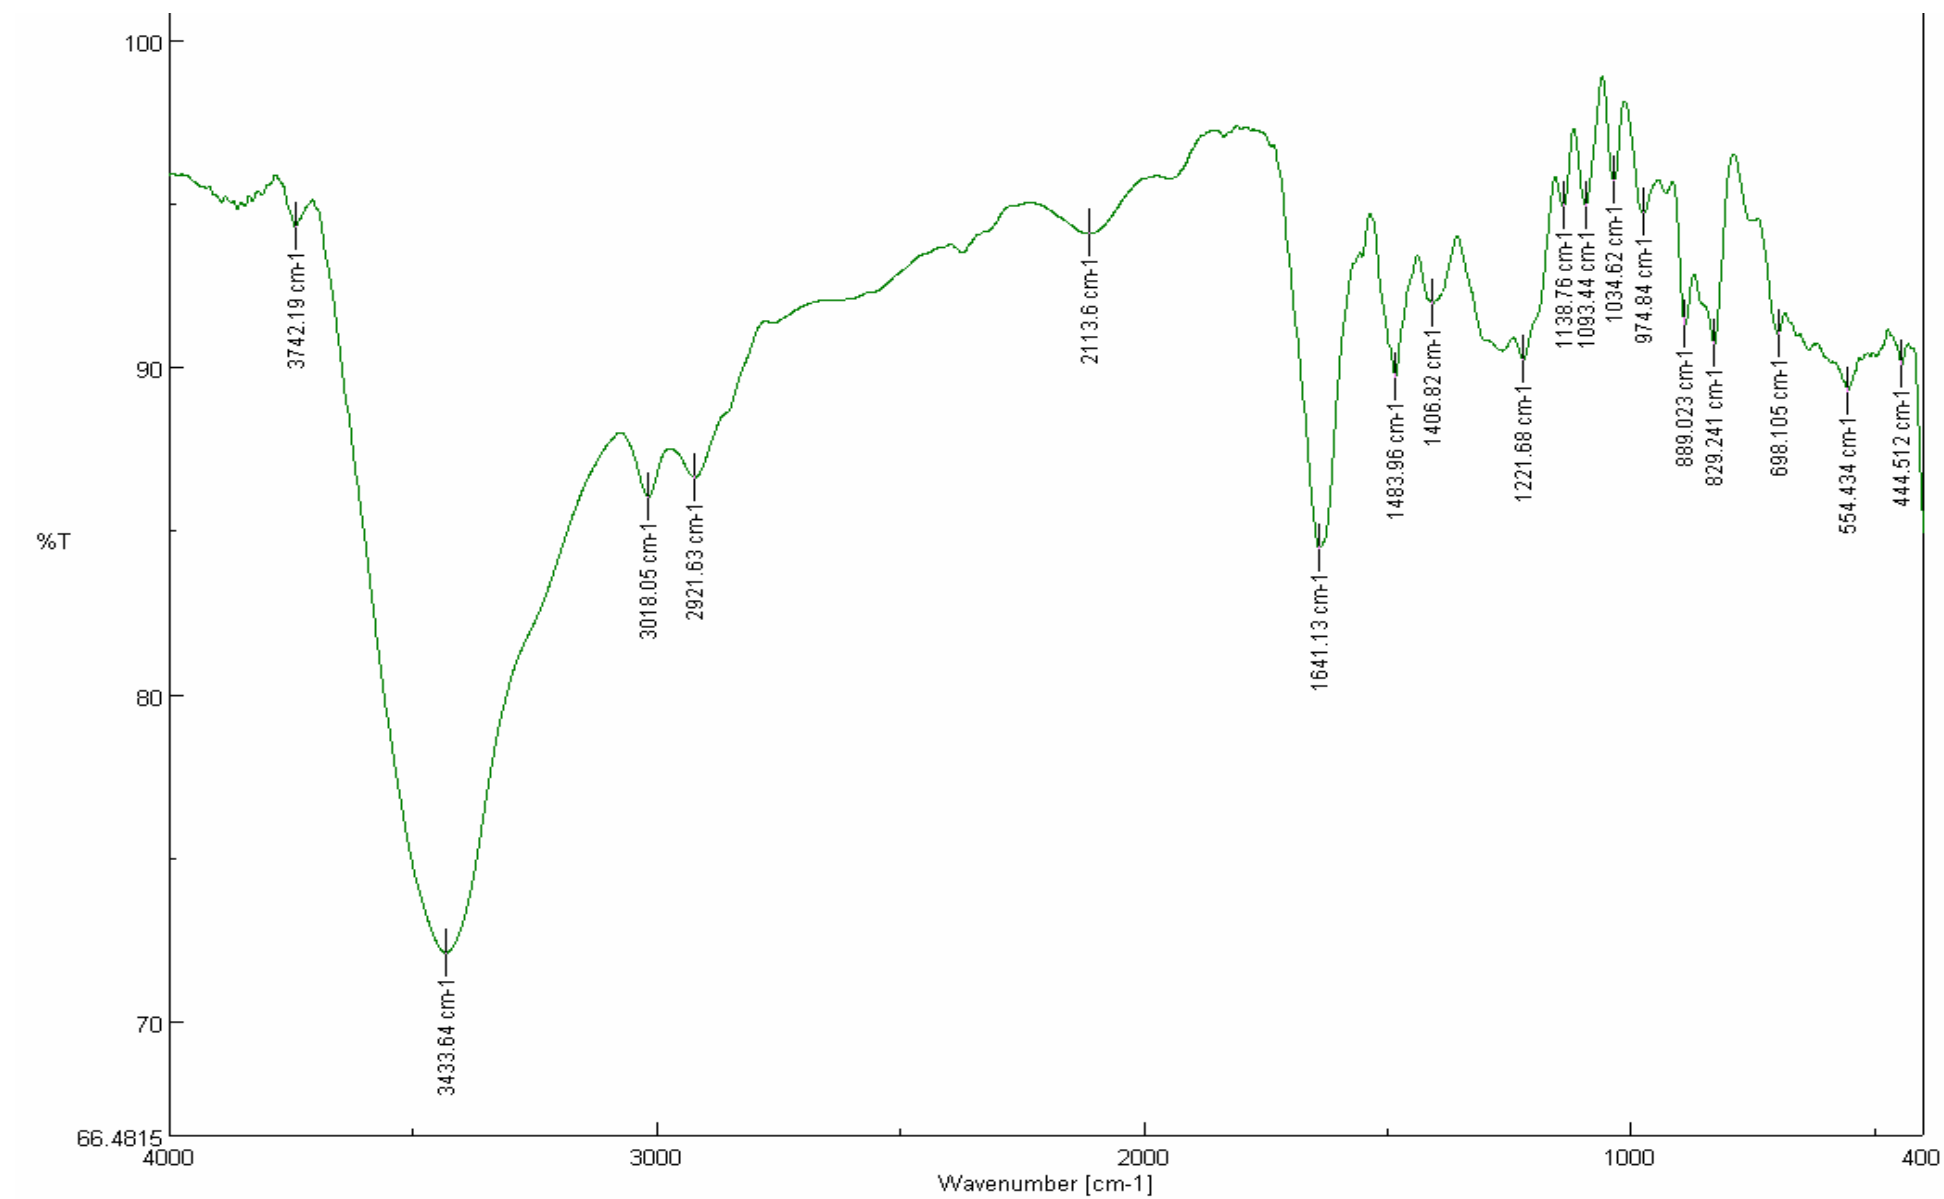

Supplement: c4ra02918f2.pdf [file c4ra02918f2.pdf]
